# Supplementary material for: Homing peptide-based ELISA-like method for the selective and sensitive determination of fibrin
Source: Royal Society of Chemistry journal article supplement (doi:10.1039/c8ay02630k), 2019-01-01
Supplement: c8ay02630k1.pdf [file c8ay02630k1.pdf]

## Supporting Information

### Homing peptide based ELISA-like method for selective and sensitive determination of fibrin

Yinghong Zhang, Yuanfu Zhang\*, Tingting Hou, Rui Li, Qingwang Xue, Shuhao Wang \*  
Shandong Provincial Key Laboratory of Chemical Energy Storage and Novel Cell Technology,  
School of Chemistry and Chemical Engineering, Liaocheng University, Liaocheng 252000, China

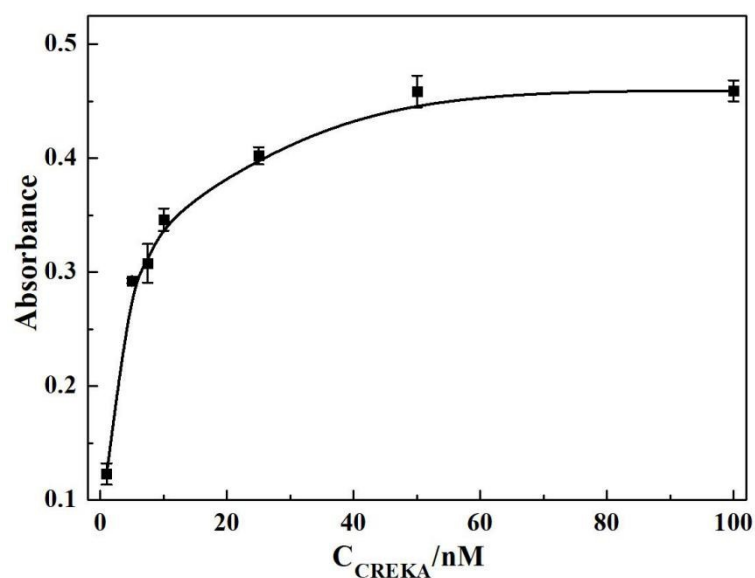

**Fig. S1.** The effect of CREKA on TMB–H<sub>2</sub>O<sub>2</sub> system. Experimental conditions: 50  $\mu\text{L}$  of 5 mM TMB, 50  $\mu\text{L}$  of 10 mM H<sub>2</sub>O<sub>2</sub>, 50  $\mu\text{L}$  of 20 mM Tris-HCl (pH 8.0), 7 min

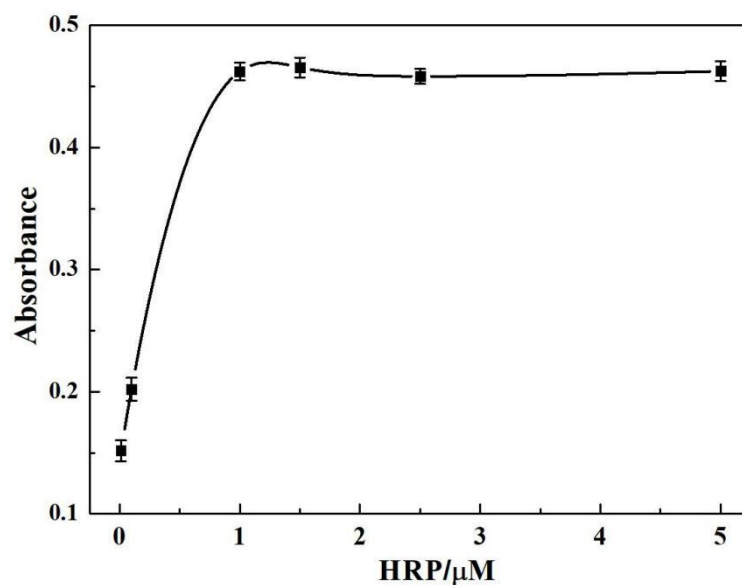

**Fig. S2.** The effect of HRP on TMB–H<sub>2</sub>O<sub>2</sub> system. Experimental conditions: 50  $\mu$ L of 5 mM TMB, 50  $\mu$ L of 10 mM H<sub>2</sub>O<sub>2</sub>, 50  $\mu$ L of 20 mM Tris-HCl (pH 8.0), 7 min.

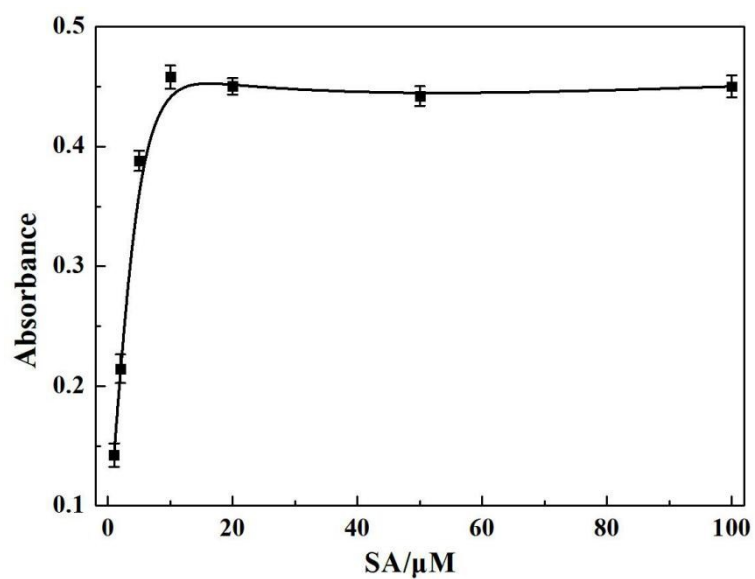

**Fig. S3.** The effect of SA on TMB–H<sub>2</sub>O<sub>2</sub> system. Experimental conditions: 50  $\mu$ L of 5 mM TMB, 50  $\mu$ L of 10 mM H<sub>2</sub>O<sub>2</sub>, 50  $\mu$ L of 20 mM Tris-HCl (pH 8.0), 7 min

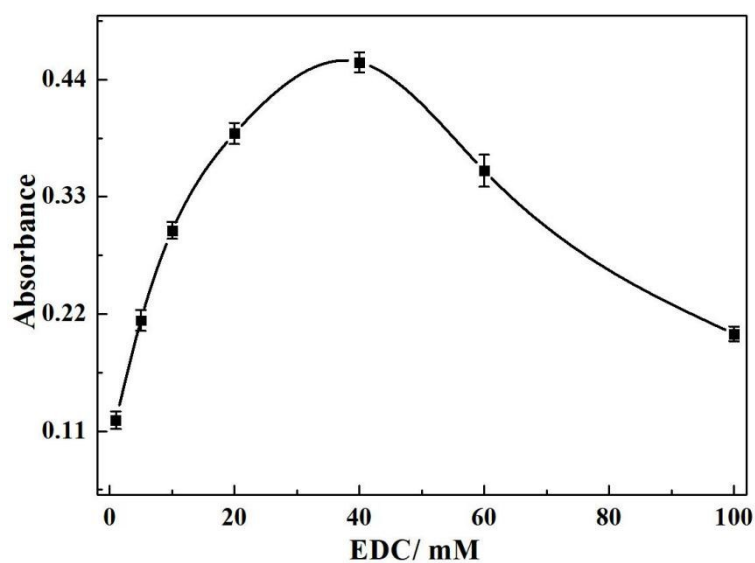

**Fig. S4.** The effect of EDC on TMB–H<sub>2</sub>O<sub>2</sub> system. Experimental conditions: 50  $\mu$ L of 5 mM TMB, 50  $\mu$ L of 10 mM H<sub>2</sub>O<sub>2</sub>, 50  $\mu$ L of 20 mM Tris-HCl (pH 8.0), 7 min.

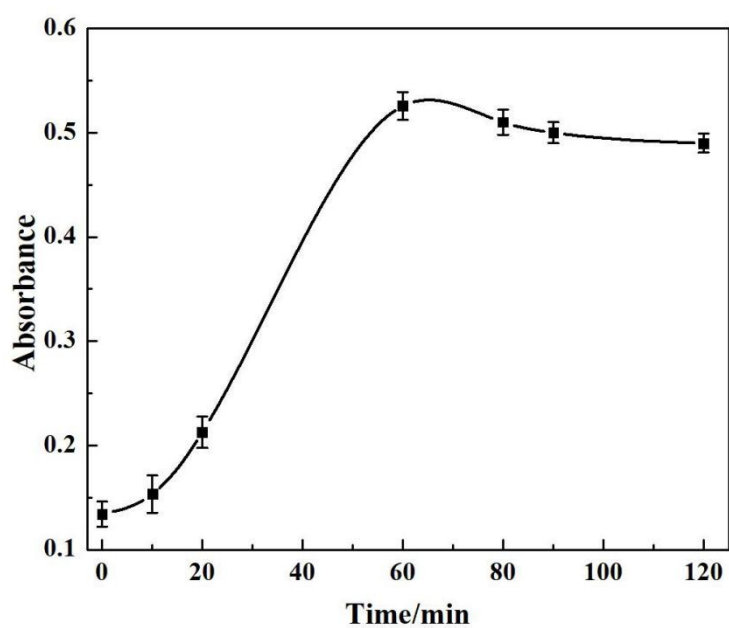

**Fig. S5.** The effect of incubation time of HRP and SA on TMB–H<sub>2</sub>O<sub>2</sub> system. Experimental conditions: 50  $\mu$ L of 5 mM TMB, 50  $\mu$ L of 10 mM H<sub>2</sub>O<sub>2</sub>, 50  $\mu$ L of 20 mM Tris-HCl (pH 8.0), 7 min.

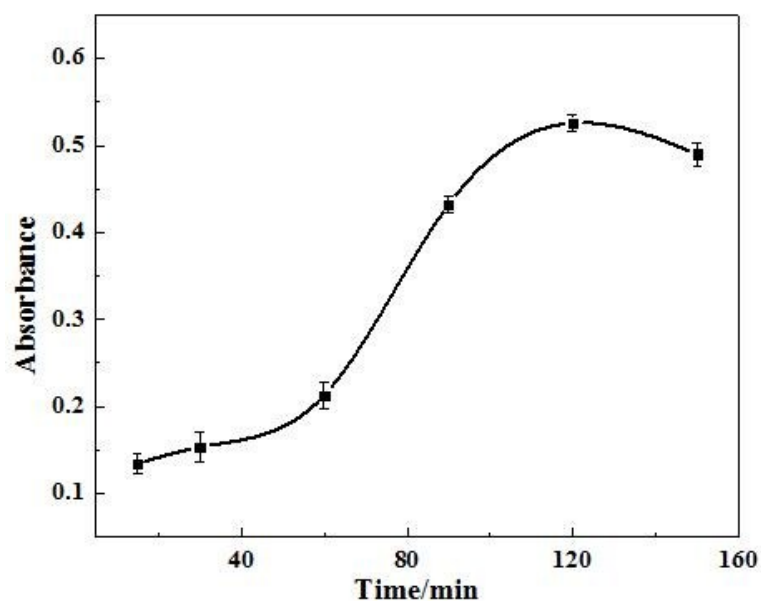

**Fig. S6.** The effect of coating time of HRP-SA-B-CREKA composite on TMB–H<sub>2</sub>O<sub>2</sub> system. Experimental conditions: 50  $\mu$ L of 5 mM TMB, 50  $\mu$ L of 10 mM H<sub>2</sub>O<sub>2</sub>, 50  $\mu$ L of 20 mM Tris-HCl (pH 8.0), 7 min.

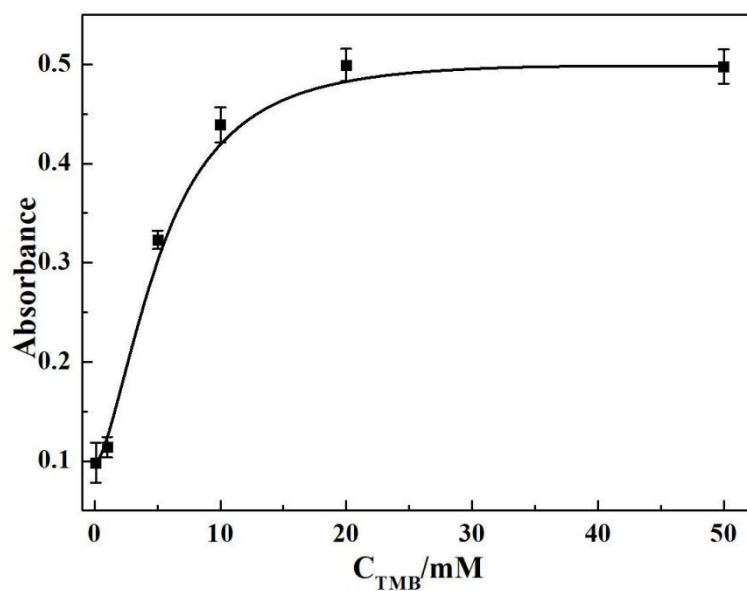

**Fig. S7.** The effect of the concentration of TMB on TMB–H<sub>2</sub>O<sub>2</sub> system. Experimental conditions: 50  $\mu$ L of TMB with different concentrations, 50  $\mu$ L of 10 mM H<sub>2</sub>O<sub>2</sub>, 50  $\mu$ L of 20 mM Tris-HCl (pH 8.0), 7 min.

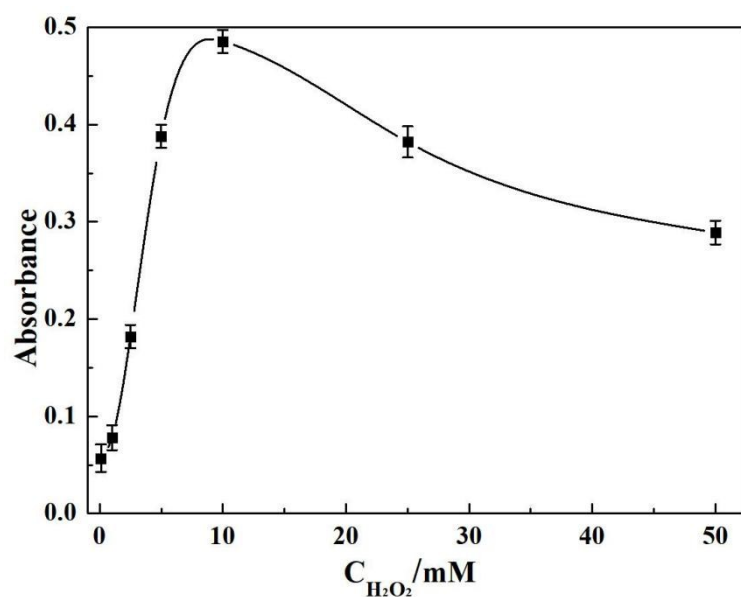

**Fig. S8.** The effect of concentration of  $H_2O_2$  on TMB- $H_2O_2$  system. Experimental conditions: 50  $\mu\text{L}$  of 5 mM TMB, 50  $\mu\text{L}$  of  $H_2O_2$  with different concentrations, 50  $\mu\text{L}$  of 20 mM Tris-HCl (pH 8.0), 7 min.

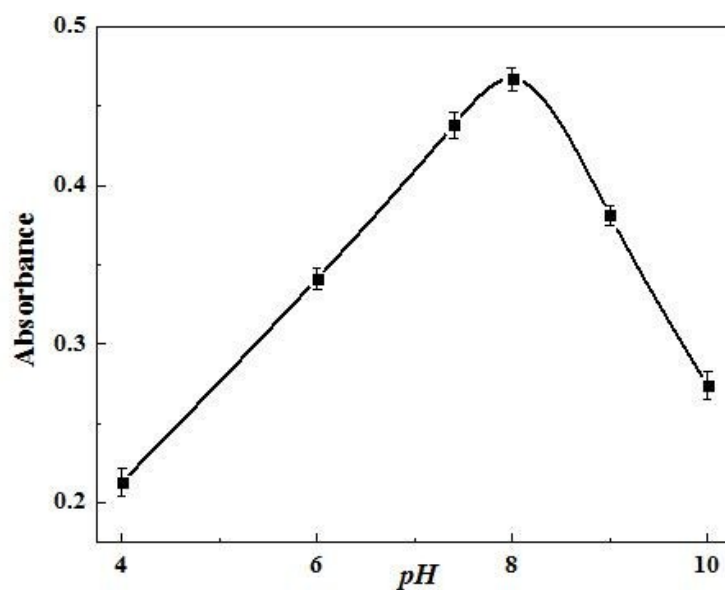

**Fig. S9.** The effect of pH on TMB- $H_2O_2$  system. Experimental conditions: 50  $\mu\text{L}$  of 5 mM TMB, 50  $\mu\text{L}$  of 10 mM  $H_2O_2$ , 50  $\mu\text{L}$  of 20 mM Tris-HCl with different pH, 7 min.
